# Supplementary material for: Development of Food Group Tree-Based Analysis and Its Association with Non-Alcoholic Fatty Liver Disease (NAFLD) and Co-Morbidities in a South Indian Population: A Large Case-Control Study
Source: MDPI journal article supplement (doi:10.3390/nu14142808), 2022-07-08
Supplement: s1 [file s1]

## Supplementary

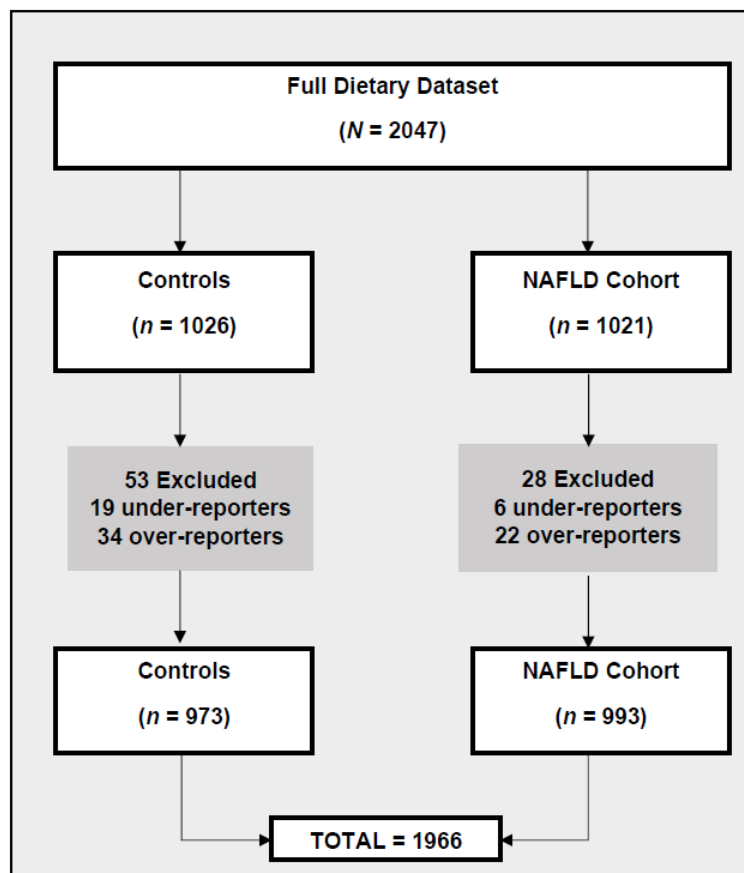

Figure S1. Participant Flow Chart.

**Table S1:** Associations between food groups and clinical outcomes amongst individuals with NAFLD.

|                             | Diabetes Mellitus |        |         |               | Hypertension |         |               | Dyslipidaemia |         |               | CVD Events |         |       |       |       |        |
|-----------------------------|-------------------|--------|---------|---------------|--------------|---------|---------------|---------------|---------|---------------|------------|---------|-------|-------|-------|--------|
|                             | <i>adj</i> OR     | 95% CI | P-value | <i>adj</i> OR | 95% CI       | P-value | <i>adj</i> OR | 95%CI         | P-value | <i>adj</i> OR | 95% CI     | P-value |       |       |       |        |
| FOOD GROUP LEVEL-1          |                   |        |         |               |              |         |               |               |         |               |            |         |       |       |       |        |
| Cereals and Millets         | 0.999             | 0.997  | 1.001   | 0.152         | 0.999        | 0.997   | 1.001         | 0.402         | 1.001   | 0.999         | 1.004      | 0.311   | 0.997 | 0.992 | 1.001 | 0.182  |
| Condiments and Spices       | 0.989             | 0.918  | 1.065   | 0.765         | 1.000        | 0.915   | 1.094         | 0.993         | 1.070   | 0.974         | 1.175      | 0.16    | 1.001 | 0.849 | 1.179 | 0.991  |
| Fats and Edible Oils        | 1.002             | 0.973  | 1.033   | 0.873         | 1.055        | 1.012   | 1.099         | 0.013*        | 0.998   | 0.963         | 1.034      | 0.912   | 0.999 | 0.931 | 1.072 | 0.978  |
| Fruits                      | 0.997             | 0.967  | 1.028   | 0.847         | 0.949        | 0.911   | 0.989*        | 0.011*        | 1.001   | 0.966         | 1.039      | 0.94    | 1.004 | 0.934 | 1.078 | 0.922  |
| Meat Fish Poultry           | 1.004             | 0.996  | 1.012   | 0.31          | 1.000        | 0.990   | 1.010         | 0.966         | 0.995   | 0.985         | 1.005      | 0.332   | 1.000 | 0.982 | 1.018 | 0.996  |
| Milk and Milk Products      | 1.001             | 0.999  | 1.004   | 0.195         | 1.003        | 1.000   | 1.005         | 0.039         | 1.000   | 0.998         | 1.003      | 0.877   | 1.001 | 0.996 | 1.006 | 0.705  |
| Nuts and Oil Seeds          | 0.996             | 0.983  | 1.008   | 0.50          | 1.005        | 0.991   | 1.020         | 0.499         | 0.995   | 0.980         | 1.010      | 0.493   | 0.971 | 0.942 | 1.001 | 0.061  |
| Pulses and Legumes          | 1.003             | 0.992  | 1.014   | 0.634         | 1.003        | 0.990   | 1.016         | 0.657         | 0.990   | 0.976         | 1.003      | 0.139   | 1.005 | 0.979 | 1.032 | 0.702  |
| Sugars                      | 1.080             | 0.971  | 1.100   | <0.001*       | 0.988        | 0.978   | 0.998         | 0.022*        | 0.988   | 0.977         | 0.999      | 0.04*   | 0.997 | 0.975 | 1.019 | 0.784  |
| Vegetables                  | 1.000             | 0.996  | 1.004   | 0.888         | 1.001        | 0.997   | 1.006         | 0.526         | 1.000   | 0.995         | 1.004      | 0.965   | 1.009 | 1.002 | 1.016 | 0.009* |
| FOOD GROUP LEVEL-2          |                   |        |         |               |              |         |               |               |         |               |            |         |       |       |       |        |
| Refined Rice                | 0.998             | 0.996  | 1.00    | 0.032*        | 0.998        | 0.995   | 1.00          | 0.062         | 1.000   | 0.997         | 1.003      | 0.816   | 1.001 | 0.995 | 1.007 | 0.815  |
| Refined Wheat               | 0.985             | 0.948  | 1.024   | 0.437         | 0.988        | 0.942   | 1.037         | 0.632         | 0.995   | 0.945         | 1.049      | 0.862   | 1.024 | 0.995 | 1.11  | 0.565  |
| Wholegrain Rice             | 0.122             | 0.028  | 0.527   | 0.005*        | 0.456        | 0.102   | 2.030         | 0.303         | 0.521   | 0.419         | 0.891      | 0.027   | 0.124 | 0.110 | 0.210 | 0.436  |
| Wholegrain Wheat            | 1.003             | 0.998  | 1.008   | 0.271         | 0.714        | 0.699   | 1.01          | 0.123         | 0.792   | 0.662         | 0.812      | 0.118   | 0.790 | 0.673 | 0.997 | 0.249  |
| Wholegrains                 | 1.032             | 0.918  | 1.160   | 0.599         | 0.979        | 0.842   | 1.136         | 0.776         | 0.960   | 0.808         | 1.141      | 0.644   | 0.990 | 0.973 | 1.007 | 0.125  |
| Dried Condiments and Spices | 1.005             | 0.890  | 1.136   | 0.933         | 0.975        | 0.841   | 1.129         | 0.733         | 1.123   | 0.942         | 1.338      | 0.197   | 0.224 | 0.190 | 0.390 | 0.493  |
| Fresh Condiments and Spices | 1.078             | 0.717  | 1.622   | 0.717         | 0.957        | 0.604   | 1.519         | 0.853         | 1.163   | 0.670         | 2.018      | 0.592   | 0.901 | 0.670 | 1.213 | 0.653  |
| Animal Fats                 | 2.144             | 1.300  | 3.536   | 0.003*        | 1.780        | 0.995   | 3.185         | 0.042         | 0.932   | 0.918         | 1.002      | 0.181   | 0.898 | 0.332 |       | 0.007* |
| Refined Plant Fat           | 1.000             | 0.954  | 1.049   | 0.99          | 0.946        | 0.884   | 1.013         | 0.111         | 0.998   | 0.937         | 1.064      | 0.957   | 0.791 | 0.285 | 2.195 | 0.951  |
| Unrefined Plant Fat         | 0.961             | 0.847  | 1.091   | 0.542         | 1.01         | 0.878   | 1.161         | 0.894         | 1.083   | 0.919         | 1.277      | 0.342   | 2.455 | 1.280 | 4.710 | 0.246  |
| Dried Fruits                | 0.999             | 0.866  | 1.153   | 0.991         | 0.989        | 0.827   | 1.161         | 0.88          | 1.063   | 0.089         | 1.264      | 0.475   | 1.004 | 0.872 | 1.157 | 0.456  |
| Fresh Fruits                | 0.999             | 0.996  | 1.003   | 0.715         | 0.991        | 0.996   | 1.004         | 0.972         | 0.882   | 0.884         | 0.899      | 0.022   | 0.943 | 0.857 | 1.103 | 0.754  |
| Eggs and Egg Products       | 0.995             | 0.963  | 1.029   | 0.788         | 1.003        | 0.966   | 1.041         | 0.874         | 0.997   | 0.952         | 1.045      | 0.904   | 0.964 | 0.983 | 1.041 | 0.228  |
| Non-Oily Fish               | 1.051             | 0.973  | 1.135   | 0.205         | 0.981        | 0.883   | 1.089         | 0.718         | 1.011   | 0.878         | 0.878      | 1.163   | 0.941 | 0.739 | 1.199 | 0.794  |
| Oily Fish                   | 1.002             | 0.988  | 1.017   | 0.772         | 1.001        | 0.983   | 1.019         | 0.914         | 0.986   | 0.878         | 1.162      | 0.197   | 0.802 | 0.451 | 1.429 | 0.435  |
| Shellfish                   | 0.746             | 0.506  | 1.101   | 0.14          | 0.972        | 0.631   | 1.51          | 0.902         | 0.934   | 0.912         | 0.964      | 0.268   | 0.193 | 1.016 | 2.32  | 0.195  |
| Red Meat                    | 1.017             | 0.998  | 1.036   | 0.077         | 1.000        | 0.976   | 1.024         | 0.979         | 0.994   | 0.964         | 1.025      | 0.705   | 1.012 | 0.983 | 1.041 | 0.622  |
| White Meat                  | 0.990             | 0.968  | 1.013   | 0.388         | 1.013        | 0.989   | 1.038         | 0.295         | 0.976   | 0.941         | 1.012      | 0.186   | 1.008 | 0.937 | 1.084 | 0.833  |

|                              |       |       |       |         |       |       |       |        |       |       |       |       |       |       |       |        |
|------------------------------|-------|-------|-------|---------|-------|-------|-------|--------|-------|-------|-------|-------|-------|-------|-------|--------|
| Dried Milk and Milk Products | 0.750 | 0.569 | 0.989 | 0.042   | 0.696 | 0.492 | 0.984 | 0.04*  | 1.143 | 0.803 | 1.628 | 0.458 | 1.758 | 0.663 | 4.657 | 0.257  |
| Fresh Milk and Milk Products | 1.001 | 0.999 | 1.003 | 0.453   | 1.002 | 0.999 | 1.004 | 0.236  | 1.002 | 0.999 | 1.005 | 0.213 | 1.004 | 0.998 | 1.01  | 0.234  |
| Nuts                         | 1.002 | 0.986 | 1.018 | 0.822   | 1.013 | 0.995 | 1.032 | 0.159  | 0.997 | 0.976 | 1.018 | 0.759 | 1.001 | 0.949 | 1.056 | 0.957  |
| Oily Seeds                   | 1.032 | 0.330 | 3.157 | 0.955   | 0.903 | 0.254 | 3.205 | 0.875  | 0.785 | 0.169 | 3.630 | 0.757 | 0.652 | 0.422 | 0.899 | 0.182  |
| Dried Pulses and Legumes     | 0.678 | 0.560 | 0.892 | 0.807   | 0.713 | 0.688 | 0.988 | 0.691  | 0.673 | 0.619 | 0.690 | 0.02* | 0.635 | 0.618 | 0.991 | 0.795  |
| Fresh Pulses and Legumes     | 0.534 | 0.418 | 0.998 | 0.825   | 0.874 | 0.835 | 1.02  | 0.281  | 0.768 | 0.722 | 0.988 | 0.187 | 0.782 | 0.739 | 0.910 | 0.603  |
| Refined Sugars               | 0.978 | 0.965 | 1.088 | <0.001* | 0.993 | 0.981 | 1.004 | 0.2    | 0.988 | 0.922 | 1.016 | 0.068 | 0.989 | 0.962 | 1.016 | 0.412  |
| Unrefined Sugars             | 0.712 | 0.702 | 0.903 | 0.833   | 0.931 | 0.798 | 1.087 | 0.368  | 0.797 | 0.606 | 1.048 | 0.104 | 0.379 | 0.151 | 0.951 | 0.039* |
| Leafy Vegetables             | 0.795 | 0.673 | 1.017 | 0.656   | 0.615 | 0.512 | 0.891 | 0.21   | 0.567 | 0.547 | 0.891 | 0.638 | 0.417 | 0.219 | 0.871 | 0.731  |
| Other Vegetables             | 1.001 | 0.993 | 1.007 | 0.993   | 0.994 | 0.994 | 1.011 | 0.279  | 0.891 | 0.781 | 0.991 | 0.868 | 0.513 | 0.418 | 0.671 | 0.114  |
| Roots and Tubers             | 0.885 | 0.816 | 0.984 | 0.415   | 0.894 | 0.883 | 1.010 | 0.584  | 0.810 | 0.784 | 1.012 | 0.77  | 0.819 | 0.715 | 1.021 | 0.554  |
| <b>FOOD GROUP LEVEL-3</b>    |       |       |       |         |       |       |       |        |       |       |       |       |       |       |       |        |
| Baked                        | 1.017 | 0.995 | 1.039 | 0.123   | 1.008 | 0.983 | 1.035 | 0.522  | 0.972 | 0.935 | 1.011 | 0.155 | 1.016 | 0.969 | 1.059 | 0.505  |
| Boiled                       | 0.799 | 0.698 | 1.00  | 0.168   | 0.771 | 0.767 | 0.810 | 0.035* | 0.701 | 0.610 | 0.991 | 0.136 | 0.501 | 0.492 | 0.889 | 0.744  |
| Fried                        | 1.020 | 0.996 | 1.089 | 0.993   | 0.999 | 0.997 | 1.004 | 0.734  | 0.999 | 0.994 | 1.005 | 0.838 | 1.004 | 0.995 | 1.012 | 0.371  |
| Roasted                      | 0.997 | 0.993 | 1.001 | 0.113   | 0.996 | 0.991 | 1.001 | 0.119  | 0.995 | 0.990 | 1.001 | 0.096 | 1.001 | 0.990 | 1.012 | 0.86   |
| Sauteed                      | 1.000 | 0.999 | 1.001 | 0.647   | 1.001 | 0.999 | 1.002 | 0.596  | 1.000 | 0.999 | 1.002 | 0.643 | 0.998 | 0.995 | 1.002 | 0.394  |
| Steamed                      | 0.781 | 0.691 | 0.981 | 0.42    | 0.662 | 0.597 | 1.006 | 0.423  | 0.606 | 0.589 | 0.610 | 0.03* | 0.710 | 0.690 | 0.918 | 0.907  |
| Juice                        | 0.986 | 0.965 | 1.001 | 0.208   | 1.003 | 0.977 | 1.029 | 0.825  | 0.983 | 0.948 | 1.019 | 0.351 | 1.023 | 0.977 | 1.071 | 0.327  |
| Uncooked                     | 0.627 | 0.597 | 0.997 | 0.261   | 0.711 | 0.700 | 0.819 | 0.239  | 0.593 | 0.491 | 0.991 | 0.827 | 0.661 | 0.513 | 0.891 | 0.664  |

\*p < 0.05 adjusted for age, gender and BMI
